# Supplementary material
Source: Elsevier journal article supplement (https://www.sciencedirect.com/science/article/pii/S0001651922000085)
Supplement: mmc1 [file S0001651922000085:mmc1.docx]

**ANEXO 1**

**CUESTIONARIO PEDIÁTRICO DE DISCAPACIDAD POR VÉRTIGO - MAREOS**

**DIZZINESS HANDICAP INVENTORY (DHI) PEDIATRICO**

|  |  | | **SI** | **A VECES** | **NO** |
| --- | --- | --- | --- | --- | --- |
| **O1** | ¿Girar la cabeza para arriba te empeora los mareos? | |  |  |  |
| **O2** | ¿Caminar por el supermercado mirando las góndolas o estanterías te empeora el mareo? | |  |  |  |
| **O3** | ¿Los juegos, los deportes, andar en bicicleta, subir a la calesita o a juegos que giran te empeoran los mareos? | |  |  |  |
| **O4** | ¿Los movimientos rápidos de la cabeza te empeoran los mareos? | |  |  |  |
| **O5** | Si te das la vuelta en la cama cuando estás acostado/a, ¿Te empeora el mareo? | |  |  |  |
| **O6** | ¿Caminar por la vereda o un terreno irregular, como el pasto o piso con desniveles te empeora los mareos? | |  |  |  |
| **O7** | Cuando bajás la cabeza o te agachás, ¿Te empeoran los mareos? | |  |  |  |
| **E8** | Por los mareos, ¿Te sentís frustrado/a o incomodo/a? | |  |  |  |
| **E9** | Por los mareos, ¿Tenés miedo de salir de tu casa? | |  |  |  |
| **E10** | Por los mareos, ¿Te sentís avergonzado/a delante de otras persona? | |  |  |  |
| **E11** | Por los mareos, ¿Tenés miedo que la gente piense que estás desorientado/a o enfermo? | |  |  |  |
| **E12** | Por los mareos, ¿Tenés dificultad para concentrarte en las actividades de la escuela? | |  |  |  |
| **E13** | Por los mareos, ¿Tenés miedo de quedarte solo/a en casa? | |  |  |  |
| **E14** | Por los mareos, ¿Te sentís en desventaja frente a tus compañeros? | |  |  |  |
| **E15** | Por los mareos, ¿Te enojás con amigos, compañeros o personas de tu familia? | |  |  |  |
| **E16** | Por los mareos, ¿Estás triste, molesto/a sin ganas de hacer nada? | |  |  |  |
| **F17** | Por los mareos, ¿Faltás a la escuela? | |  |  |  |
| **F18** | Por los mareos, ¿Tenés dificultad para acostarte o levantarte de la cama? | |  |  |  |
| **F19** | ¿Dejas de ir a cumpleaños, fiestas, cine, locales de videojuegos, por los mareos? | |  |  |  |
| **F20** | Por los mareos, ¿Tenés problemas para leer, dibujar o pintar? | |  |  |  |
| **F21** | Por los mareos, ¿Dejás de subir a lugares altos? | |  |  |  |
| **F22** | Por los mareos, ¿Te resulta difícil saltar, correr, jugar a la pelota, andar en bicicleta? | |  |  |  |
| **F23** | Por los mareos, ¿Te resulta difícil caminar solo/a, sin ayuda? | |  |  |  |
| **F24** | Por los mareos, ¿Te resulta difícil caminar en la oscuridad? | |  |  |  |
| **F25** | ¿Los mareos dificultan o entorpecen tus estudios? (rendimiento escolar) | |  |  |  |
|  | **TOTALES** | **DHI Emocional** |  |  |  |
|  | **DHI Funcional** |  |  |  |
|  | **DHI Físico (O)** |  |  |  |
|  | **DHI TOTAL** |  |  |  |

| **A) ESCALA EMOCIONAL:36**  **B) ESCALA FUNCIONAL: 36**  **C) ESCALA FÍSICA (O): 28** | A O B: 0 A 14: SIN DISCAPACIDAD  15 A 24: DISCAPACIDAD MODERADA  25 A 36: DISCAPACIDAD SEVERA | C: 0 A 9: SIN DISCAPACIDAD  10 A 16: DISCAPACIDAD MODERADA  17 A 28: DISCAPACIDAD SEVERA |
| --- | --- | --- |
